# Supplementary material for: Cultural effects on the association between election outcomes and face-based trait inferences
Source: PubMed Central journal article supplement (PMC5507274; doi:10.1371/journal.pone.0180837), 2017-07-10
Supplement: pone.0180837.s002.pdf [file pone.0180837.s002.pdf]

**S2 Table.** The Effect of Response Time on the Association between Face-based Trait Inferences and Real Election Outcomes.

|                                        | <b>Model 1</b>       | <b>Model 2</b>       | <b>Model 3</b>       | <b>Model 4</b>        | <b>Model 5</b>        | <b>Model 5a<br/>Adj Errors</b> |
|----------------------------------------|----------------------|----------------------|----------------------|-----------------------|-----------------------|--------------------------------|
| Log Time                               | -0.112 **<br>(0.035) | -0.093 .<br>(0.050)  | -0.138 *<br>(0.067)  | -0.215 ***<br>(0.056) | -0.229 *<br>(0.091)   | <b>-0.229 .</b><br>(0.137)     |
| Candidate Culture (1 = Korean)         |                      | 0.117 ***<br>(0.026) |                      |                       | 0.118 ***<br>(0.035)  | 0.118<br>(0.107)               |
| Candidate Culture * Log Time           |                      | -0.026<br>(0.069)    |                      |                       | -0.026<br>(0.073)     | -0.026<br>(0.105)              |
| Competence                             |                      |                      | 0.135 ***<br>(0.037) |                       | 0.120 **<br>(0.037)   | <b>0.120 *</b><br>(0.053)      |
| Open-mindedness                        |                      |                      | 0.078 *<br>(0.037)   |                       | 0.092 *<br>(0.037)    | <b>0.092 .</b><br>(0.048)      |
| Threat                                 |                      |                      | 0.074 *<br>(0.037)   |                       | 0.078 *<br>(0.037)    | <b>0.078 .</b><br>(0.042)      |
| Competence * Log Time                  |                      |                      | 0.073<br>(0.096)     |                       | 0.092<br>(0.105)      | 0.092<br>(0.129)               |
| Open-mindedness * Log Time             |                      |                      | -0.060<br>(0.096)    |                       | -0.065<br>(0.101)     | -0.065<br>(0.119)              |
| Threat * Log Time                      |                      |                      | 0.119<br>(0.095)     |                       | 0.157<br>(0.100)      | 0.157<br>(0.117)               |
| Participant Culture (1 = Korean)       |                      |                      |                      | -0.048<br>(0.035)     | -0.045<br>(0.035)     | -0.045<br>(0.047)              |
| Participant Culture * Log Time         |                      |                      |                      | 0.060<br>(0.050)      | 0.052<br>(0.050)      | 0.052<br>(0.061)               |
| Gender (1 = Female)                    |                      |                      |                      | 0.003<br>(0.027)      | 0.002<br>(0.027)      | 0.002<br>(0.030)               |
| Age                                    |                      |                      |                      | -0.003<br>(0.003)     | -0.003<br>(0.003)     | -0.003<br>(0.003)              |
| Education                              |                      |                      |                      | 0.030 *<br>(0.012)    | 0.029 *<br>(0.012)    | <b>0.029 *</b><br>(0.013)      |
| Years in U.S.                          |                      |                      |                      | 0.005 *<br>(0.002)    | 0.005 *<br>(0.002)    | 0.005<br>(0.003)               |
| Political Participation: Vote          |                      |                      |                      | -0.108 ***<br>(0.031) | -0.107 ***<br>(0.031) | <b>-0.107 **</b><br>(0.038)    |
| Political Participation: Talk Politics |                      |                      |                      | 0.001<br>(0.009)      | 0.001<br>(0.009)      | 0.001<br>(0.009)               |
| Political Participation: Campaign      |                      |                      |                      | -0.010<br>(0.027)     | -0.010<br>(0.027)     | -0.010<br>(0.026)              |
| Wilson Patterson Scale                 |                      |                      |                      | 0.142<br>(0.152)      | 0.149<br>(0.152)      | 0.149<br>(0.192)               |
| Liberal-Conservative Placement         |                      |                      |                      | 0.022 .<br>(0.013)    | 0.022 .<br>(0.013)    | 0.022<br>(0.020)               |
| Political Knowledge Score              |                      |                      |                      | -0.117 .<br>(0.070)   | -0.110<br>(0.070)     | -0.110<br>(0.099)              |
| Individualism Score                    |                      |                      |                      | -0.010<br>(0.105)     | -0.012<br>(0.105)     | -0.012<br>(0.112)              |
| Collectivism Score                     |                      |                      |                      | 0.278 *<br>(0.110)    | 0.266 *<br>(0.110)    | <b>0.266 .</b><br>(0.139)      |
| Goodness of Fit: C-index               | 0.513                | 0.521                | 0.520                | 0.526                 | 0.536                 | 0.536                          |

Significant codes: 0 '\*\*\*' 0.001 '\*\*' 0.01 '\*' 0.05 '.'
